# Supplementary material for: A comparative study about attitudes towards the efficiency, effectiveness, and atmosphere of offline and online learning among medical students
Source: PubMed Central journal article supplement — Ann Transl Med. 2022 Dec;10(23):1270. doi: 10.21037/atm-22-5112 (PMC9816847; doi:10.21037/atm-22-5112), 2022-12
Supplement: atm-10-23-1270-rc.pdf [file atm-10-23-1270-rc.pdf]

## Quality assessment criteria for survey research reports

| Category                  | Item                                                                                                                                                                                                                       | Reported on Page Number/Line Number | Reported on Section/Paragraph |
|---------------------------|----------------------------------------------------------------------------------------------------------------------------------------------------------------------------------------------------------------------------|-------------------------------------|-------------------------------|
| <b>Title and abstract</b> |                                                                                                                                                                                                                            |                                     |                               |
|                           | Is the design of the study stated in the title and/or abstract?                                                                                                                                                            | Page2/Lines 34-38                   | Abstract/Paragraph2           |
| <b>Introduction</b>       |                                                                                                                                                                                                                            |                                     |                               |
|                           | a) Is there an explanation of why the research is necessary, placing the study in context of previous work in relevant fields?                                                                                             | Page2-3/Lines 58-99                 | Introduction/Paragraph1-3     |
|                           | b) Is the purpose or aim of the paper explained?                                                                                                                                                                           | Page3/Lines 94-99                   | introduction/Paragraph3       |
| <b>Methods</b>            |                                                                                                                                                                                                                            |                                     |                               |
| Research tool             | a) Is the questionnaire described?                                                                                                                                                                                         | Page4/Lines 104-119                 | Method/Paragraph1             |
|                           | b) If an existing tool was used, are its psychometric properties presented?                                                                                                                                                | No                                  |                               |
|                           | c) If an existing tool was used, are references to the original work provided?                                                                                                                                             | No                                  |                               |
|                           | d) If a new tool was used, are the procedures used to develop and pre-test provided?                                                                                                                                       | Page4/Lines 104                     | Method/Paragraph1             |
|                           | e) If a new tool was used, have its reliability and validity been reported?                                                                                                                                                | Page4/Lines 117-119                 | Method/Paragraph1             |
|                           | f) Is a description of the scoring procedures provided?                                                                                                                                                                    | Page4/Lines 110-116                 | Method/Paragraph1             |
| Sample selection          | a) Is there a description of the survey population and the sample frame used to identify this population?                                                                                                                  | Page4/Lines 126-134                 | Method/Paragraph2             |
|                           | b) Do the authors provide a description of how representative the sample is of the underlying population?                                                                                                                  | Page4/Lines 120-123                 | Method/Paragraph1             |
|                           | c) Is a sample size calculation or rationale/justification for the sample size presented?                                                                                                                                  | No                                  |                               |
| Survey administration     | a) Mode of administration?                                                                                                                                                                                                 | No                                  |                               |
|                           | b) Do the authors provide information on the type of contact and how many attempts were made to contact subjects (i.e., prenotification by letter or telephone, reminder postcard, duplicate questionnaire with reminder)? | Page4/Lines 126-134                 | Method/Paragraph2             |
|                           | c) Do the authors report whether incentives were provided (financial or other)?                                                                                                                                            | Page9/Lines 299                     | Acknowledgement/Paragraph1    |
|                           | d) Is there a description of who approached potential participants (e.g., identification of who signed the covering letter)?                                                                                               | No                                  |                               |

|                                   |                                                                                                            |                       |                            |
|-----------------------------------|------------------------------------------------------------------------------------------------------------|-----------------------|----------------------------|
| Analysis                          | a) Is the method of data analysis described?                                                               | Page5/Lines 136-145   | Method/Paragraph3          |
|                                   | b) Do the authors provide methods for analysis of nonresponse error?                                       | No                    |                            |
|                                   | c) Is the method for calculating response rate provided?                                                   | No                    |                            |
|                                   | d) Are definitions provided for complete versus partial completions?                                       | No                    |                            |
|                                   | e) Are the methods for handling item missing data provided?                                                | Page5/Lines 131-134   | Method/Paragraph3          |
| <b>Results</b>                    |                                                                                                            |                       |                            |
|                                   | a) Is the response rate reported?                                                                          | Page5/Lines 133       | Method/Paragraph2          |
|                                   | b) Are all respondents accounted for?                                                                      | Page5/Lines 133       | Method/Paragraph2          |
|                                   | c) Is information given on how nonrespondents differ from respondents?                                     | No                    |                            |
|                                   | d) Are the results clearly presented?                                                                      | Page5/Lines 149-168   | Result/Paragraph1-2        |
|                                   | e) Do the results address the objective(s)?                                                                | Page5/Lines 149-168   | Result/Paragraph1-2        |
| <b>Discussion</b>                 |                                                                                                            |                       |                            |
|                                   | a) Are the results summarized with reference to the study objectives?                                      | Page6-8/Lines 172-245 | Discussion/paragraph1-4    |
|                                   | b) Are the strengths of the study stated?                                                                  | Page3/Lines 94-98     | Introduction/paragraph3    |
|                                   | c) Are the limitations of the study (taking into account potential sources of bias or imprecision) stated? | No                    |                            |
|                                   | d) Is there explicit discussion of the generalizability (external validity) of the results?                | No                    |                            |
| <b>Ethical quality indicators</b> |                                                                                                            |                       |                            |
|                                   | a) Study funding reported?                                                                                 | Page9/Lines 299       | Acknowledgement/Paragraph1 |
|                                   | b) Research Ethics Board (REB) review reported?                                                            | Page5/Lines 137-141   | Method/Paragraph2          |
|                                   | c) Reporting of subject consent procedures?                                                                | Page5/Lines 136-137   | Method/Paragraph2          |

Article information: <https://dx.doi.org/10.21037/atm-22-5112>

\*As the checklist was provided upon initial submission, the page number/line number reported may be changed due to copyediting and may not be referable in the published version. In this case, the section/paragraph may be used as an alternative reference.
